# Supplementary material for: Acute kidney tubular injury after ingestion of red yeast rice supplement
Source: PubMed Central journal article supplement (PMC11153872; doi:10.1093/ckj/sfae151), 2024-05-16
Supplement: sfae151_supplemental_file.pdf [file sfae151_supplemental_file.pdf]

## **Supplementary Materials**

### **Acute tubular injury after ingestion of red yeast rice supplement**

Miyazaki R, Takahashi Y, Kawamura T, Ueda H, Tsuboi N and Yokoo T

#### **Table of Contents**

- Supplementary Table S1. Laboratory data on admission
- Supplementary References

## Supplemental Table

**Table S1. Laboratory data on admission**

|                                                        | Reference range   | Results   |
|--------------------------------------------------------|-------------------|-----------|
| <i>Blood cell count</i>                                |                   |           |
| White blood cell count (/ $\mu$ L)                     | 3,300-8,600       | 8,700     |
| Eosinophil count (/ $\mu$ L)                           | 0-300             | 200       |
| Red blood cell count (/ $\mu$ L)                       | 3,860,000-4920000 | 4,830,000 |
| Hemoglobin (g/dL)                                      | 11.6-14.8         | 13.7      |
| Platelet count (/ $\mu$ L)                             | 158,000-348000    | 268,000   |
| <i>Serum biochemistry</i>                              |                   |           |
| Total protein(g/dL)                                    | 6.6–8.1           | 7.7       |
| Albumin (g/dL)                                         | 4.1–5.1           | 4.6       |
| Total bilirubin (mg/dL)                                | 0.4–1.5           | 0.4       |
| Alanine aminotransferase (U/L)                         | 13–30             | 17        |
| Aspartate aminotransferase (U/L)                       | 7–23              | 15        |
| Alkaline phosphatase (U/L)                             | 106–322           | 88        |
| Creatine kinase (U/L)                                  | 41-153            | 79        |
| Lactate dehydrogenase (U/L)                            | 124-222           | 316       |
| Creatinine (mg/dL)                                     | 0.46–0.79         | 4.70      |
| C-reactive protein (mg/L)                              | >0.14             | 0.09      |
| Sodium (mEq/L)                                         | 138-145           | 138       |
| Potassium (mEq/L)                                      | 3.6-4.8           | 3.6       |
| Chloride (mEq/L)                                       | 101-108           | 111       |
| Urine acid (mg/dL)                                     | 2.6-5.5           | 2.5       |
| Calcium (mg/dL)                                        | 8.8-10.1          | 9.3       |
| Phosphorus (mg/dL)                                     | 2.7-4.6           | 3.7       |
| Beta-2 microglobulin (mg/L)                            | 1.0-1.9           | 4.85      |
| Hemoglobin A1c (%)                                     | 4.9-6.0           | 5.9       |
| Glucose (mg/dL)                                        | 73-109            | 85        |
| Triglycerides (mg/dL)                                  | 30-117            | 84        |
| Total cholesterol (mg/dL)                              | 142-248           | 235       |
| low-density lipoprotein cholesterol (mg/dL)            | 65-163            | 147       |
| Immunoglobulin G (mg/dL)                               | 870–1,700         | 1312      |
| Immunoglobulin G4 (mg/dL)                              | 11-121            | 46        |
| Immunoglobulin A (mg/dL)                               | 110–410           | 236       |
| Immunoglobulin M (mg/dL)                               | 35–220            | 150       |
| Complement component 3 (mg/dL)                         | 65–135            | 115.3     |
| Complement component 4 (mg/dL)                         | 13–35             | 38.9      |
| CH50 (U/mL)                                            | 30–50             | 67.7      |
| Antinuclear antibody                                   | 0–39              | <40       |
| Rheumatoid factor                                      | 0–15              | 2         |
| Antistreptolysin O (U/mL)                              | <160              | 163       |
| Serum cryoglobulin                                     | Negative          | Negative  |
| Monoclonal protein                                     | Negative          | Negative  |
| Proteinase 3-anti-neutrophil cytoplasmic antibodies    | Negative          | Negative  |
| Myeloperoxidase-anti-neutrophil cytoplasmic antibodies | Negative          | Negative  |
| Anti-glomerular basement membrane antibodies           | Negative          | Negative  |

|                                         |          |          |
|-----------------------------------------|----------|----------|
| Hepatitis B surface antigen             | Negative | Negative |
| Hepatitis B surface antibody            | Negative | Negative |
| Hepatitis B core antibody               | Negative | Negative |
| Hepatitis C virus antibody              | Negative | Negative |
|                                         |          |          |
| <i>Urinalysis</i>                       |          |          |
| Specific gravity                        |          | 1.024    |
| pH                                      |          | 6.0      |
| Glucose                                 |          | 4+       |
| Protein                                 |          | 3+       |
| Hematuria (/high power field)           |          | 5-9      |
| Granular cast (/high power field)       |          | 10-19    |
| Tubular epithelium (/5high power field) |          | 1        |
| Urinary beta-2 microglobulin (µg/L)     |          | 109,677  |
| N-acetyl-beta-D-glucosaminidase (U/L)   |          | 16.6     |
|                                         |          |          |
| <i>24-hour Urinalysis</i>               |          |          |
| Protein (mg/day)                        |          | 1,384    |
| Creatinine clearance (mL/min)           |          | 15       |

### Supplemental References

1. Rhabdomyolysis linked to Chinese red yeast rice. *Prescrire Int.* 2008; 17 (94): 64.
2. Peterslund P, Christensen HD, Urbahnke J, Cappeln AV. [Red yeast rice as the presumed cause of acute kidney and liver failure]. *Ugeskr Laeger.* 2019; 30,181 (40): V02190107. Danish. PMID: 31566178.
3. Prasad GV, Wong T, Meliton G, Bhaloo S. Rhabdomyolysis due to red yeast rice (*Monascus purpureus*) in a renal transplant recipient. *Transplantation.* 2002; 27,74 (8): 1200-1.
